# Supplementary material for: A novel gene-expression-signature-based model for prediction of response to Tripterysium glycosides tablet for rheumatoid arthritis patients
Source: Springer Nature journal article supplement (doi:10.1186/s12967-018-1549-9), 2018-07-04
Supplement: MOESM2 [file 15908256]

## Additional file 2 Primer sequences used in the qPCR analysis

| <b>Primers</b> | <b>Sequence</b>                                                                               |
|----------------|-----------------------------------------------------------------------------------------------|
| MX1_F          | CTCCGACACGAGTTCCACAA                                                                          |
| MX1_R          | GGCTCTTCCAGTGCCTTGAT                                                                          |
| OASL_F         | TTCAGCGAGCTGCAGAGAAA                                                                          |
| OASL_R         | CCCTCTGCTCCACTGTCAAG                                                                          |
| SPINK1_F       | TGACCCTGTCTGTGGGACTG                                                                          |
| SPINK1_R       | TCAGCAAGGCCAGATTTTTTG                                                                         |
| CRK_F          | AGGCAGGGTAGTGGAGTGAT                                                                          |
| CRK_R          | CTTCAGGCTTGTCCCGGATT                                                                          |
| GRAPL_F        | CTACAGAGAGCGACGAGCTG                                                                          |
| GRAPL_R        | GAAGGCTCCCAGATGGTTCC                                                                          |
| RNF2_F         | CGAACACCTCAGGAGGCAAT                                                                          |
| RNF2_R         | TGCCACTTCTAAGGGCTGTG                                                                          |
| VAV2_F         | ACGGGGAAGTCAAAGTCCG                                                                           |
| VAV2_R         | CCACATTTTCCCGTGAGACTTC                                                                        |
| GAPDH          | Cat No. B661104-0001 [Sangon<br>Biotech (Shanghai) Co., Ltd.]<br>Cat No. B661101-0001 [Sangon |
| RPS18          | Biotech (Shanghai) Co., Ltd. ]                                                                |
