# Supplementary material for: A novel gene-expression-signature-based model for prediction of response to Tripterysium glycosides tablet for rheumatoid arthritis patients
Source: Springer Nature journal article supplement (doi:10.1186/s12967-018-1549-9), 2018-07-04
Supplement: MOESM3 [file 15908256]

**Additional file 3 Differentially expressed genes between responder and non-responder groups**

| <b>Gene Symbol</b> | <b>style</b> |
|--------------------|--------------|
| ABRA               | up           |
| ACER2              | down         |
| ACTL6B             | down         |
| AGAP11             | down         |
| ALG3               | down         |
| ANKRD16            | down         |
| ANKRD30BL          | down         |
| ANKRD45            | down         |
| BMP5               | down         |
| C11orf36           | up           |
| C12orf60           | down         |
| C1orf51            | down         |
| C21orf7            | down         |
| C2orf69            | up           |
| C3orf37            | up           |
| C4orf45            | down         |
| C6orf203           | up           |
| C7orf53            | down         |
| C8orf31            | up           |
| CALML6             | down         |
| CAV2               | down         |
| CBWD7              | up           |
| CCDC121            | up           |
| CCDC87             | down         |
| CCDC89             | up           |
| CCL19              | down         |
| CCL4L2             | up           |
| CD22               | up           |
| CD8B               | down         |
| CETP               | down         |
| CIB2               | down         |
| CRK                | up           |
| CSAG1              | down         |
| CXCL6              | down         |
| DOLPP1             | down         |
| EIF2AK4            | up           |
| ERI1               | up           |
| ERVW-1             | down         |
| ESAM               | down         |
| FAM110B            | up           |

|           |      |
|-----------|------|
| FAM115A   | up   |
| FAM127A   | up   |
| FAM18B2   | up   |
| FAM216B   | up   |
| FAM47A    | up   |
| FAM69B    | down |
| FAM86C1   | up   |
| FBXO28    | up   |
| FBXW10    | down |
| FEM1A     | up   |
| FEZ1      | up   |
| FFAR3     | down |
| FGF5      | down |
| FN1       | up   |
| FNDC9     | up   |
| FOXA3     | up   |
| FUT1      | down |
| GABRR2    | down |
| GBAP1     | up   |
| GDPD3     | up   |
| GH2       | up   |
| GHR       | up   |
| GIP       | up   |
| GJB7      | up   |
| GOLGA6L1  | down |
| GOLGA6L5  | up   |
| GPR83     | down |
| GRAPL     | up   |
| GRM4      | down |
| GSTZ1     | down |
| HAND1     | up   |
| HLA-DRB1  | down |
| HNF1A-AS1 | up   |
| HSPB8     | up   |
| HTR3B     | up   |
| HTR3C     | down |
| ICT1      | down |
| ID2       | up   |
| IFI35     | down |
| IGF1      | down |
| IPW       | down |
| JAZF1     | up   |
| KRTAP19-7 | down |

|              |      |
|--------------|------|
| KRTAP4-12    | down |
| LBP          | down |
| LDLRAP1      | down |
| LINC00304    | down |
| LINC00474    | down |
| LOC100131373 | down |
| LOC100506123 | down |
| LOC100653008 | down |
| LOC439911    | up   |
| LOC440173    | down |
| MAGEA10      | down |
| MC3R         | up   |
| MDP1         | up   |
| MED18        | down |
| MEMO1        | down |
| MFSD9        | down |
| MGC32805     | down |
| MIR137HG     | up   |
| MLF1IP       | up   |
| MLLT11       | down |
| MLN          | down |
| MORN4        | up   |
| MRGPRX1      | down |
| MX1          | down |
| NAP1L2       | up   |
| NECAB3       | down |
| NGFRAP1      | down |
| NIT1         | down |
| NOC2L        | down |
| NPFFR2       | down |
| NS3BP        | up   |
| OASL         | down |
| OAZ1         | down |
| OR13C9       | down |
| OR1B1        | down |
| OR1G1        | up   |
| OR3A2        | down |
| OR4D9        | down |
| OR51M1       | up   |
| OR52N5       | down |
| OR5AU1       | down |
| OR5B12       | up   |
| OR5P3        | up   |

|           |      |
|-----------|------|
| OR6C2     | down |
| OR7E5P    | up   |
| OR7G3     | up   |
| OR8U1     | up   |
| OR9I2P    | up   |
| P4HA2     | down |
| PBX2      | up   |
| PCDHB7    | down |
| PDCL      | up   |
| PDGFRL    | down |
| PLA2G10   | down |
| PLEKHG4B  | down |
| PMCHL2    | down |
| PNMA2     | down |
| PNMA6C    | up   |
| PNMT      | up   |
| PP13      | down |
| PRH2      | down |
| PRRG3     | down |
| PTGFRN    | down |
| PXT1      | down |
| RAB28     | up   |
| RAB33B    | up   |
| RAB39B    | up   |
| RACGAP1P  | up   |
| RETSAT    | up   |
| RHEB      | up   |
| RHOXF1    | up   |
| RNASEH1   | up   |
| RNF2      | up   |
| RNF8      | down |
| RNPS1     | up   |
| RPL23     | down |
| RPL36AL   | down |
| RPS2P32   | down |
| RRP7A     | up   |
| RUSC1-AS1 | up   |
| RXRG      | down |
| SATB2-AS1 | down |
| SIGLEC11  | up   |
| SLC22A5   | down |
| SLC35E3   | up   |
| SLC37A4   | down |

|          |      |
|----------|------|
| SLC45A4  | up   |
| SLC7A2   | down |
| SMCP     | down |
| SNX20    | up   |
| SON      | up   |
| SORL1    | up   |
| SOSTDC1  | down |
| SPATA3   | down |
| SPINK1   | down |
| SPOCD1   | down |
| SSX6     | up   |
| SUCLG1   | down |
| TAAR1    | down |
| TAF13    | up   |
| TAS2R20  | down |
| TAS2R31  | up   |
| TBC1D3P2 | up   |
| TCTN2    | up   |
| TIMM23   | down |
| TMC7     | up   |
| TMEM154  | up   |
| TMEM69   | down |
| TNFSF18  | down |
| TPGS2    | down |
| TPM3P9   | up   |
| TUBA1B   | down |
| UST      | up   |
| VAV2     | up   |
| VSTM4    | up   |
| WFDC6    | up   |
| YPEL1    | up   |
| ZNF132   | up   |
| ZNF169   | up   |
| ZNF200   | up   |
| ZNF35    | up   |
| ZNF384   | up   |
| ZNF555   | up   |
| ZNF571   | up   |
| ZNF660   | down |
| ZNF670   | down |
| ZNF721   | up   |
| ZNF79    | up   |
| ZSCAN10  | up   |
